# Supplementary material for: MASSpy: Building, simulating, and visualizing dynamic biological models in Python using mass action kinetics
Source: PLoS Comput Biol. 2021 Jan 28;17(1):e1008208. doi: 10.1371/journal.pcbi.1008208 (PMC7872247; doi:10.1371/journal.pcbi.1008208)
Supplement: S1 Data — Includes growth data and volume measurements observed for E. coli growth on glucose and pyruvate media, and equilibrium constants from eQuilibrator used in the case study to construct the E. coli glycolytic subnetwork. (XLSX) [file pcbi.1008208.s006.xlsx]

## Sheet: Flux Growth Data
ID	Growth Medium	Flux (mmol * gDW-1 * h-1)	Additional Notes
EX_ac_e	Glucose	6.82702
ACt2rpp	Glucose	-6.82702
ACKr	Glucose	-6.82702
PTAr	Glucose	6.82702
ACS	Glucose	0
EX_fru_e	Glucose	0
FRUpts2pp	Glucose	0
FRUK	Glucose	0
EX_gal_e	Glucose	0
GALabcpp	Glucose	0
GALKr	Glucose	0
UGLT	Glucose	0
PGMT	Glucose	0
EX_glc__D_e	Glucose	-9.654
GLCt2pp	Glucose	9.654
EX_glyc_e	Glucose	0
GLYCtpp	Glucose	0
GLYCK	Glucose	0
G3PD5	Glucose	0
EX_glcn_e	Glucose	0
GLCNt2rpp	Glucose	0
GNK	Glucose	0
EX_pyr_e	Glucose	0
PYRt2rpp	Glucose	0
EX_succ_e	Glucose	0
EX_fum_e	Glucose	9.65373e-08
EX_lac__D_e	Glucose	0
D_LACt2pp	Glucose	0
LDH_D	Glucose	0
PGI	Glucose	5.69997
PFK	Glucose	7.05848	Data given as ( PFK - FBP )
FBP	Glucose	0	Data given as ( PFK - FBP )
FBA	Glucose	7.05848
TPI	Glucose	7.05848
GAPD	Glucose	15.7104
PGK	Glucose	-15.7104
PGM	Glucose	-14.5577
ENO	Glucose	14.5577
PYK	Glucose	2.48731	Data given as ( PYK - PPS )
PPS	Glucose	0	Data given as ( PYK - PPS )
PDH	Glucose	11.2985
EDD	Glucose	1.08699
EDA	Glucose	1.08699
G6PDH2r	Glucose	3.91928
PGL	Glucose	3.91928
GND	Glucose	2.83228
RPI	Glucose	-1.42744
RPE	Glucose	1.40485
TKT1	Glucose	0.820202
TALA	Glucose	-0.820202
TKT2	Glucose	0.584644
PPC	Glucose	2.45333
PPCK	Glucose	0.540874
CS	Glucose	2.97797
ACONTa	Glucose	2.97797
ACONTb	Glucose	2.97797
ICDHyr	Glucose	2.97797
AKGDH	Glucose	2.13807
SUCOAS	Glucose	-2.13807
SUCDi	Glucose	2.13807
FUM	Glucose	2.13807
MDH	Glucose	1.06904	Data given as ( MDH + MDH2 ), assume even flux split
MDH2	Glucose	1.06904	Data given as ( MDH + MDH2 ), assume even flux split
ME1	Glucose	-4.77862e-08	Data given as ( ME1 + ME2), assume even flux split
ME2	Glucose	-4.77862e-08	Data given as ( ME1 + ME2), assume even flux split
ICL	Glucose	9.65404e-10
MALS	Glucose	9.65404e-10
BIOMASS_Ec_iML1515_core_75p37M	Glucose	0.65	Glucose data obtained from the following source: Data S1 file in Gerosa et al. [1]
EX_ac_e	Pyruvate	11.9139
ACt2rpp	Pyruvate	-11.9139
ACKr	Pyruvate	-11.9139
PTAr	Pyruvate	11.9139
ACS	Pyruvate	0
EX_fru_e	Pyruvate	0
FRUpts2pp	Pyruvate	0
FRUK	Pyruvate	0
EX_gal_e	Pyruvate	0
GALabcpp	Pyruvate	0
GALKr	Pyruvate	0
UGLT	Pyruvate	0
PGMT	Pyruvate	0
EX_glc__D_e	Pyruvate	0
GLCt2pp	Pyruvate	0
EX_glyc_e	Pyruvate	0
GLYCtpp	Pyruvate	0
GLYCK	Pyruvate	0
G3PD5	Pyruvate	0
EX_glcn_e	Pyruvate	0
GLCNt2rpp	Pyruvate	0
GNK	Pyruvate	0
EX_pyr_e	Pyruvate	-26.714
PYRt2rpp	Pyruvate	26.714
EX_succ_e	Pyruvate	0
EX_fum_e	Pyruvate	0
EX_lac__D_e	Pyruvate	1.15701
D_LACt2pp	Pyruvate	-1.15701
LDH_D	Pyruvate	-1.15701
PGI	Pyruvate	-0.898173
PFK	Pyruvate	0	Data given as ( PFK - FBP )
FBP	Pyruvate	0.587012	Data given as ( PFK - FBP )
FBA	Pyruvate	-0.587012
TPI	Pyruvate	-0.587012
GAPD	Pyruvate	-1.12931
PGK	Pyruvate	1.12931
PGM	Pyruvate	1.78914
ENO	Pyruvate	-1.78914
PYK	Pyruvate	0	Data given as ( PYK - PPS )
PPS	Pyruvate	3.45038	Data given as ( PYK - PPS )
PDH	Pyruvate	21.0174
EDD	Pyruvate	2.67142e-09
EDA	Pyruvate	2.67142e-09
G6PDH2r	Pyruvate	0.876802
PGL	Pyruvate	0.876802
GND	Pyruvate	0.876802
RPI	Pyruvate	-0.538926
RPE	Pyruvate	0.337875
TKT1	Pyruvate	0.247744
TALA	Pyruvate	-0.247744
TKT2	Pyruvate	0.0901313
PPC	Pyruvate	2.48945
PPCK	Pyruvate	1.1648
CS	Pyruvate	8.08192
ACONTa	Pyruvate	8.08192
ACONTb	Pyruvate	8.08192
ICDHyr	Pyruvate	7.97932
AKGDH	Pyruvate	7.41565
SUCOAS	Pyruvate	-7.41565
SUCDi	Pyruvate	7.51826
FUM	Pyruvate	7.51826
MDH	Pyruvate	3.7139	Data given as ( MDH + MDH2 ), assume even flux split
MDH2	Pyruvate	3.7139	Data given as ( MDH + MDH2 ), assume even flux split
ME1	Pyruvate	0.0965303	Data given as ( ME1 + ME2), assume even flux split
ME2	Pyruvate	0.0965303	Data given as ( ME1 + ME2), assume even flux split
ICL	Pyruvate	0.102601
MALS	Pyruvate	0.102601
BIOMASS_Ec_iML1515_core_75p37M	Pyruvate	0.39	Pyruvate data obtained from the following source: Data S1 file in Gerosa et al. [1]

## Sheet: Concentration Growth Data
ID	Name	Growth Medium	Concentration (µmol * gDW-1)	Standard Deviation (µmol * gDW-1)	Concentration (mol * L-1)	Standard Deviation (mol * L-1)	Additional Notes
adp_c	Adenosine diphosphate	Glucose	1.39061	0.016966	0.00218524	2.66609e-05
amp_c	Adenosine monophosphate	Glucose	1.1091	0.0566185	0.00174288	8.8972e-05
atp_c	Adenosine triphosphate	Glucose	7.93302	0.155459	0.0124662	0.000244292
nad_c	Nicotinamide-adenine-dinucleotide	Glucose	4.85947	0.282534	0.00763631	0.000443982
nadh_c	Nicotinamide-adenine-dinucleotide-reduced	Glucose	0.0630548	0.00301185	9.90861e-05	4.7329e-06
13dpg_c	3-Phospho-D-glyceroyl-phosphate	Glucose	0.116827	0.00437115	0.000183585	6.86895e-06
f6p_c	D-Fructose-6-phosphate	Glucose	0.772725	0.06681	0.00121428	0.000104987
dhap_c	Dihydroxyacetone-phosphate	Glucose	3.03666	0.198603	0.0047719	0.00031209
g6p_c	D-Glucose-6-phosphate	Glucose	2.18307	0.0412242	0.00343054	6.47808e-05
pep_c	Phosphoenolpyruvate	Glucose	0.812263	0.182039	0.00127641	0.000286061
pyr_c	Pyruvate	Glucose	3.23185	0.800224	0.00507863	0.00125749
2pg_c	D-Glycerate-2-phosphate	Glucose	1.83039	0.0864315	0.00287632	0.000135821	Data given as 2pg + 3pg
3pg_c	D-Glycerate-3-phosphate	Glucose	1.83039	0.0864315	0.00287632	0.000135821	Data given as 2pg + 3pg
fdp_c	D-Fructose-1-6-bisphosphate	Glucose	2.6702	0.052587	0.00419603	8.26367e-05
gdp_c	Guanosine-5'-diphosphate	Glucose	0.767199	0.00757925	0.0012056	1.19103e-05	Glucose data obtained from the following source: Data S1 file in Gerosa et al. [1]
adp_c	Adenosine diphosphate	Pyruvate	0.987584	0.0429249	0.00155192	6.74535e-05
amp_c	Adenosine monophosphate	Pyruvate	0.771928	0.0141433	0.00121303	2.22252e-05
atp_c	Adenosine triphosphate	Pyruvate	5.77604	0.174116	0.00907663	0.000273611
nad_c	Nicotinamide-adenine-dinucleotide	Pyruvate	6.75051	0.186801	0.0106079	0.000293544
nadh_c	Nicotinamide-adenine-dinucleotide-reduced	Pyruvate	0.201825	0.171054	0.000317154	0.000268798
13dpg_c	3-Phospho-D-glyceroyl-phosphate	Pyruvate	0.0661758	0.00530399	0.000103991	8.33484e-06
f6p_c	D-Fructose-6-phosphate	Pyruvate	0.662711	0.0816096	0.0010414	0.000128244
dhap_c	Dihydroxyacetone-phosphate	Pyruvate	1.10617	0.0515229	0.00173827	8.09645e-05
g6p_c	D-Glucose-6-phosphate	Pyruvate	1.28912	0.0719997	0.00202576	0.000113142
pep_c	Phosphoenolpyruvate	Pyruvate	0.397032	0.0316647	0.000623907	4.97588e-05
pyr_c	Pyruvate	Pyruvate	NaN	NaN	NaN	NaN
2pg_c	D-Glycerate-2-phosphate	Pyruvate	0.685952	0.0935392	0.00107792	0.00014699	Data given as 2pg + 3pg
3pg_c	D-Glycerate-3-phosphate	Pyruvate	0.685952	0.0935392	0.00107792	0.00014699	Data given as 2pg + 3pg
fdp_c	D-Fructose-1-6-bisphosphate	Pyruvate	0.315762	0.0385081	0.000496198	6.05127e-05
gdp_c	Guanosine-5'-diphosphate	Pyruvate	0.425818	0.0252011	0.000669143	3.96017e-05	Pyruvate data obtained from the following source: Data S1 file in Gerosa et al. [1]

## Sheet: GPRs
Enzyme	GPR
PGI	b4025
PFK1	b3916
PFK2	b1723
FBP1	b4232
FBP2	b3925
FBA1	b2925
FBA2	b2097
TPI	b3919
GAPD	b1779
PGK	b2926
PGMi	b0755
PGMd	b3612
ENO	b2779
PYK1	b1854
PYK2	b1676
PPS	b1702
LDH_D	b1380

## Sheet: Equilibrium Constants
Reaction	Stoichiometry	Equilibrium Constant	Reference
PGI	g6p_c <=> f6p_c	0.364	Flamholz et al. [2]
PFK	atp_c + f6p_c --> adp_c + fdp_c + h_c	2000	Flamholz et al. [2]
FBP	fdp_c + h2o_c --> f6p_c + pi_c	41.5	Flamholz et al. [2]
FBA	fdp_c <=> dhap_c + g3p_c	0.00016	Flamholz et al. [2]
TPI	dhap_c <=> g3p_c	0.106952	Flamholz et al. [2]
GAPD	g3p_c + nad_c + pi_c <=> _13dpg_c + h_c + nadh_c	0.452	Flamholz et al. [2]
PGK	_3pg_c + atp_c <=> _13dpg_c + adp_c	0.00053	Flamholz et al. [2]
PGM	_2pg_c <=> _3pg_c	5.3	Flamholz et al. [2]
ENO	_2pg_c <=> h2o_c + pep_c	5.19	Flamholz et al. [2]
PYK	adp_c + h_c + pep_c --> atp_c + pyr_c	21739.1	Flamholz et al. [2]
PPS	atp_c + h2o_c + pyr_c --> amp_c + 2.0 * h_c + pep_c + pi_c	2.41	Flamholz et al. [2]
LDH_D	lac__D_c + nad_c <=> h_c + nadh_c + pyr_c	6.7e-05	Flamholz et al. [2]

## Sheet: E. coli physiological data
Growth Medium	Glucose	Pyruvate	Additional Notes
Growth Rate (mmol * gDW-1 * h-1)	0.65	0.39	From Gerosa et al. [1]
Doubling time/minute	63.9828	106.638
Cellular Dry Weight (DW) in g	2.49733e-13	1.33094e-13
Volume (fL)	3.2	2.1	From Volkmer B and Heinemann M. [3]
Real Total weight (g)*	3.52e-12	2.31e-12	Assume density is 1.1 g/mL
Real Dry Weight**	1.056e-12	6.93e-13	Assume water is 70% of total mass
Adjusted Volume (fL)	2.24	1.47
Cell Real Dry Weight /Adjusted Volume (gDW/L)	1571.43	1571.43
Culture Temperature (K)	313.15	313.15	From Gerosa et al. [1]

## Sheet: Reference
References
1. Gerosa L, Haverkorn van Rijsewijk BRB, Christodoulou D, Kochanowski K,Schmidt TSB, Noor E, et al. Pseudo-transition Analysis Identifies the KeyRegulators of Dynamic Metabolic Adaptations from Steady-State Data. Cell Syst.2015;1(4):270–282.
2. Flamholz A, Noor E, Bar-Even A, Milo R. eQuilibrator—the biochemicalthermodynamics calculator. Nucleic Acids Research. 2012;40(D1):D770–D775.doi:10.1093/nar/gkr874
3. Volkmer B, Heinemann M. Condition-dependent cell volume and concentration ofEscherichia coli to facilitate data conversion for systems biology modeling. PLoSOne. 2011;6(7):e23126
